# Supplementary material for: Epigenetic imprinting alterations as effective diagnostic biomarkers for early-stage lung cancer and small pulmonary nodules
Source: PubMed Central journal article supplement (PMC8672623; doi:10.1186/s13148-021-01203-5), 2021-12-14

Fig. S1

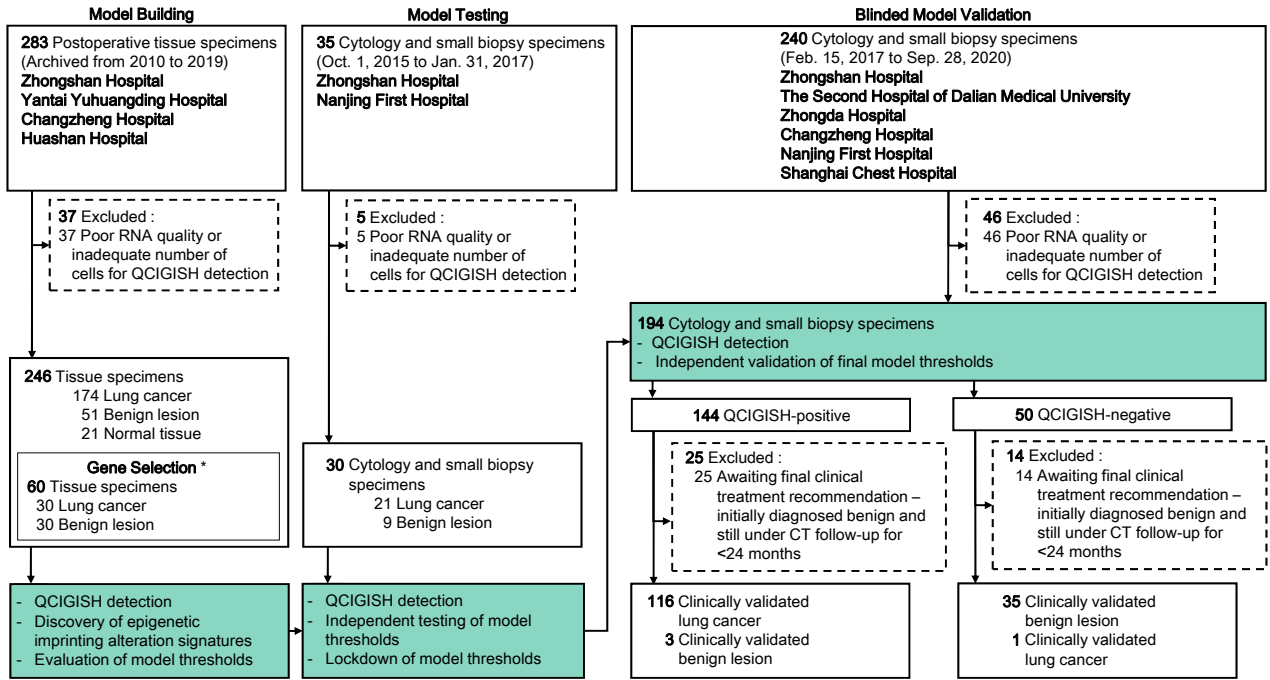

Fig. S2

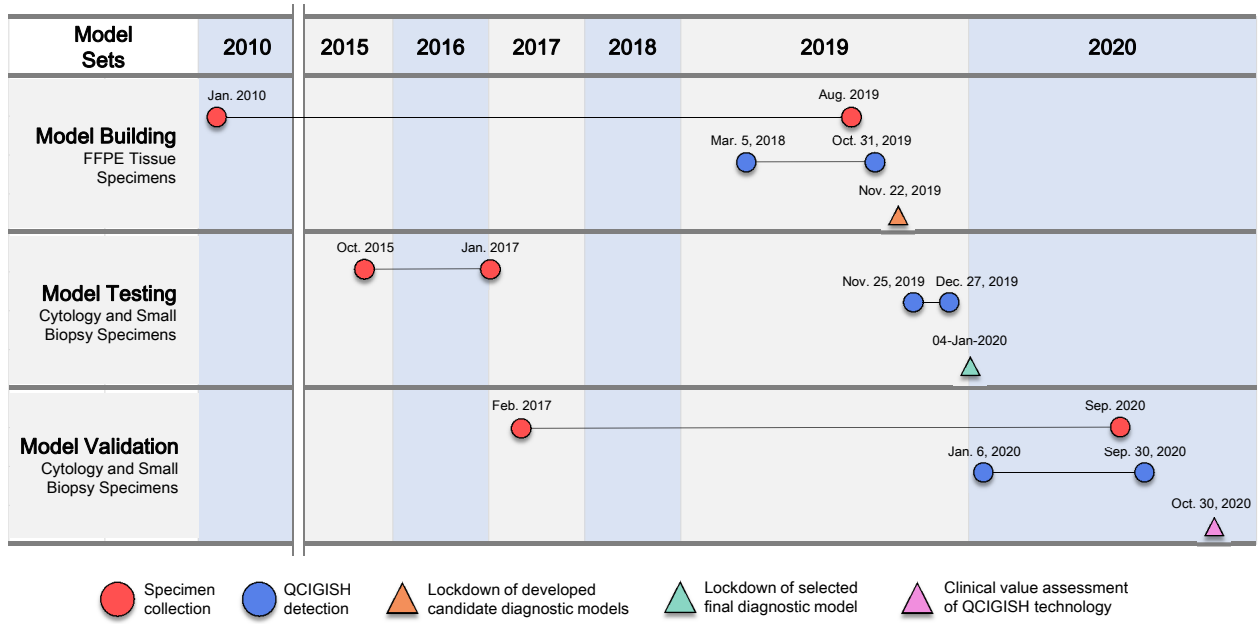

Fig. S3

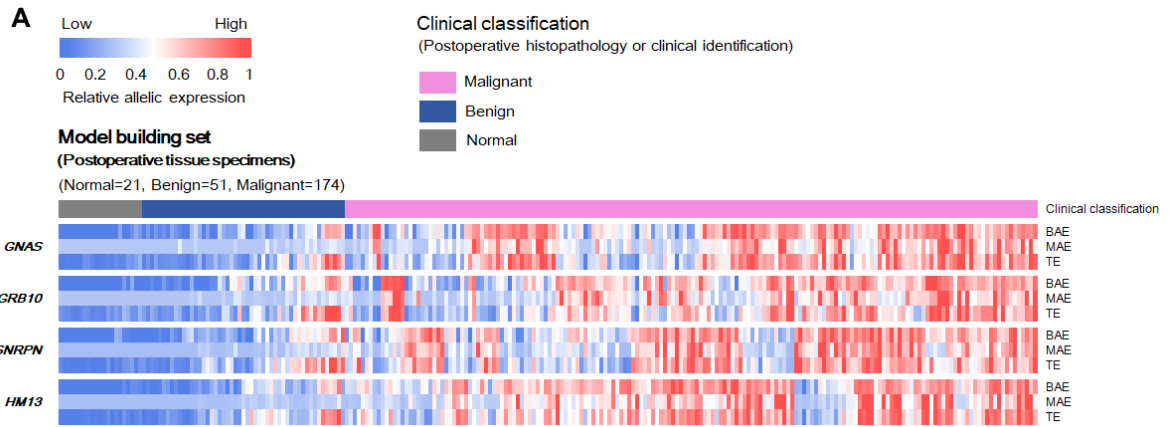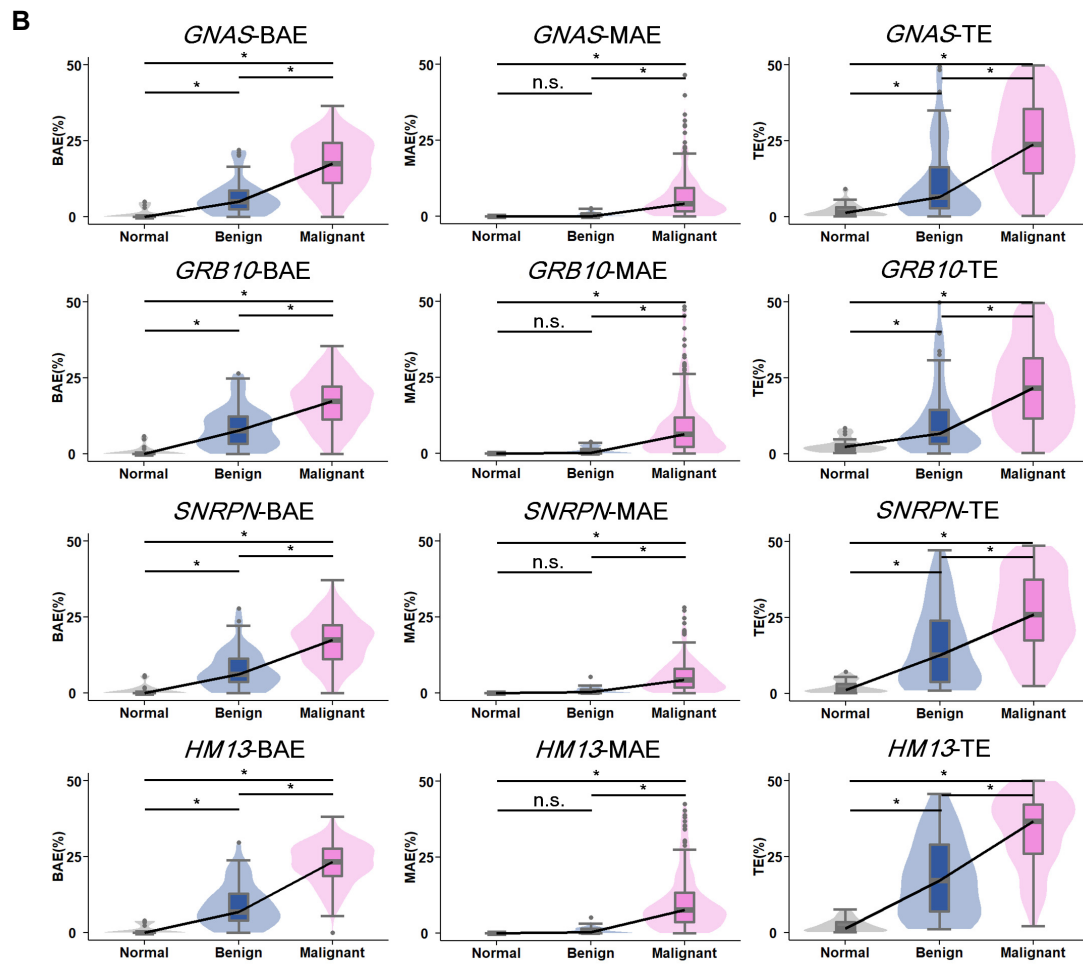

Fig. S4

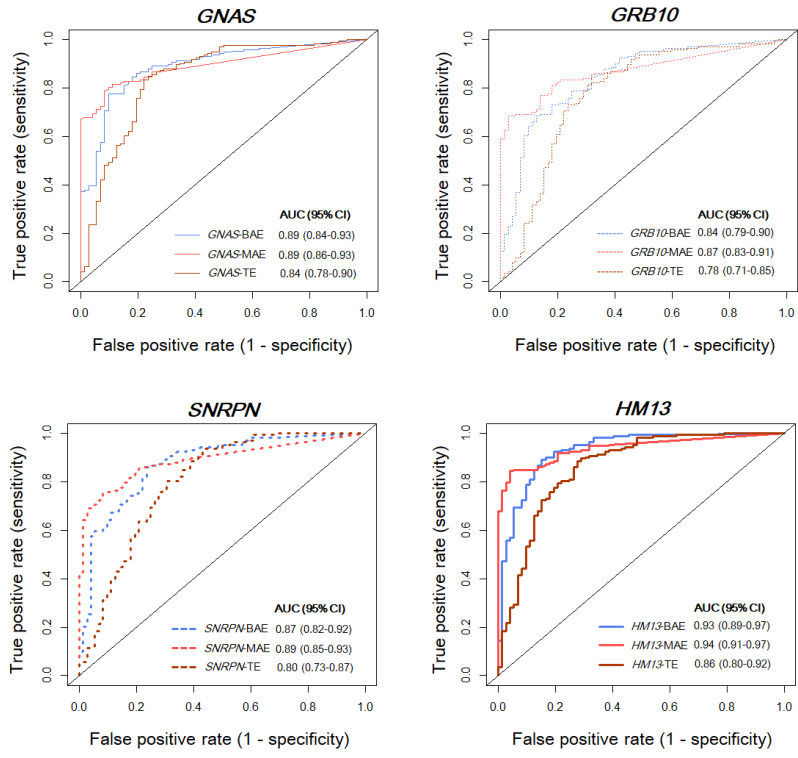

Fig. S5

Highly specific imprinted gene biomarker\*  
 Highly sensitive imprinted gene biomarker\*  
 Highly accurate imprinted gene biomarker\*

\* Sensitivity, specificity or overall accuracy >= 80%  
 \*\* Best biomarker for each disease subtype

|                                                                            |     | Individual gene BAE, MAE and TE classification accuracy for lung normal, benign and malignant subtypes using maximum (sensitivity + specificity) |                  |                 |                   |                   |                  |                   |                   |                  |                  |                  |                 |  |
|----------------------------------------------------------------------------|-----|--------------------------------------------------------------------------------------------------------------------------------------------------|------------------|-----------------|-------------------|-------------------|------------------|-------------------|-------------------|------------------|------------------|------------------|-----------------|--|
| Accuracy by clinical classification subtypes                               | n   | <i>GNAS</i> -BAE                                                                                                                                 | <i>GNAS</i> -MAE | <i>GNAS</i> -TE | <i>GRB10</i> -BAE | <i>GRB10</i> -MAE | <i>GRB10</i> -TE | <i>SNRPN</i> -BAE | <i>SNRPN</i> -MAE | <i>SNRPN</i> -TE | <i>HM13</i> -BAE | <i>HM13</i> -MAE | <i>HM13</i> -TE |  |
| Specificity for normal and benign                                          | 72  | 90.28% **                                                                                                                                        | 90.28%           | 76.39%          | 87.50%            | 97.22% **         | 69.44%           | 76.39%            | 91.67%            | 56.94%           | 84.72%           | 95.83%           | 72.22%          |  |
| Specificity for all normal                                                 | 21  | 100.00% **                                                                                                                                       | 100.00% **       | 100.00% **      | 100.00% **        | 100.00% **        | 100.00% **       | 100.00% **        | 100.00% **        | 100.00% **       | 100.00% **       | 100.00% **       | 100.00% **      |  |
| Specificity for normal                                                     | 21  | 100.00% **                                                                                                                                       | 100.00% **       | 100.00% **      | 100.00% **        | 100.00% **        | 100.00% **       | 100.00% **        | 100.00% **        | 100.00% **       | 100.00% **       | 100.00% **       | 100.00% **      |  |
| Specificity for all benign                                                 | 51  | 86.27% **                                                                                                                                        | 86.27%           | 66.67%          | 82.35%            | 96.08% **         | 56.86%           | 66.67%            | 86.24%            | 39.22%           | 78.43%           | 94.12%           | 60.78%          |  |
| Specificity for pulmonary sclerosing pneumocytoma                          | 13  | 92.31% **                                                                                                                                        | 92.31%           | 84.62% **       | 92.31% **         | 100.00% **        | 78.92%           | 69.23%            | 92.31%            | 23.08%           | 84.62%           | 92.31%           | 69.23%          |  |
| Specificity for cryptogenic organizing pneumonia                           | 10  | 90.00% **                                                                                                                                        | 100.00% **       | 40.00%          | 80.00%            | 100.00% **        | 40.00%           | 60.00%            | 90.00%            | 10.00%           | 80.00%           | 100.00% **       | 50.00%          |  |
| Specificity for pulmonary cryptococcosis                                   | 10  | 90.00% **                                                                                                                                        | 80.00%           | 80.00% **       | 90.00% **         | 90.00%            | 80.00% **        | 90.00% **         | 90.00%            | 80.00% **        | 90.00% **        | 100.00% **       | 70.00%          |  |
| Specificity for pulmonary tuberculosis                                     | 10  | 70.00%                                                                                                                                           | 80.00%           | 70.00%          | 70.00%            | 100.00% **        | 60.00%           | 70.00%            | 90.00%            | 60.00%           | 50.00%           | 80.00%           | 50.00%          |  |
| Specificity for pulmonary inflammatory pseudotumor                         | 3   | 100.00% **                                                                                                                                       | 100.00% **       | 100.00% **      | 66.67%            | 100.00% **        | 33.33%           | 66.67%            | 100.00% **        | 66.67%           | 66.67%           | 100.00% **       | 66.67%          |  |
| Specificity for inflammation                                               | 3   | 66.67%                                                                                                                                           | 33.33%           | 33.33%          | 100.00% **        | 100.00% **        | 0.00%            | 0.00%             | 66.67%            | 0.00%            | 100.00% **       | 100.00% **       | 66.67%          |  |
| Specificity for granuloma                                                  | 2   | 100.00% **                                                                                                                                       | 100.00% **       | 0.00%           | 50.00%            | 50.00%            | 0.00%            | 50.00%            | 50.00%            | 0.00%            | 100.00% **       | 100.00% **       | 50.00%          |  |
| Sensitivity for all malignant                                              | 174 | 77.59%                                                                                                                                           | 80.46%           | 85.06%          | 68.39%            | 68.39%            | 81.61%           | 86.21%            | 75.86%            | 93.68% **        | 89.08% **        | 84.48% **        | 88.51%          |  |
| Sensitivity for adenocarcinoma                                             | 82  | 75.61%                                                                                                                                           | 79.27%           | 85.37%          | 70.73%            | 74.39%            | 82.93%           | 90.24% **         | 80.49%            | 93.90% **        | 85.37%           | 87.80% **        | 89.02%          |  |
| Sensitivity for squamous cell carcinoma                                    | 76  | 78.95%                                                                                                                                           | 81.58%           | 85.53%          | 75.00%            | 73.68%            | 86.84%           | 78.95%            | 65.79%            | 92.11%           | 94.74% **        | 90.79% **        | 93.42% **       |  |
| Sensitivity for adenocarcinoma <i>in situ</i>                              | 12  | 83.33%                                                                                                                                           | 75.00%           | 83.33%          | 16.67%            | 0.00%             | 41.67%           | 100.00% **        | 100.00% **        | 100.00% **       | 75.00%           | 33.33%           | 58.33%          |  |
| Sensitivity for adenosquamous cell carcinoma                               | 2   | 50.00%                                                                                                                                           | 100.00% **       | 50.00%          | 0.00%             | 0.00%             | 50.00%           | 100.00% **        | 100.00% **        | 100.00% **       | 100.00% **       | 50.00%           | 100.00% **      |  |
| Sensitivity for large cell carcinoma                                       | 1   | 100.00% **                                                                                                                                       | 100.00% **       | 100.00% **      | 100.00% **        | 100.00% **        | 100.00% **       | 100.00% **        | 100.00% **        | 100.00% **       | 100.00% **       | 0.00%            | 0.00%           |  |
| Sensitivity for adenocarcinoma, squamous cell and neuroendocrine carcinoma | 1   | 100.00% **                                                                                                                                       | 100.00% **       | 100.00% **      | 100.00% **        | 100.00% **        | 100.00% **       | 100.00% **        | 100.00% **        | 100.00% **       | 100.00% **       | 100.00% **       | 100.00% **      |  |
| Accuracy for all cases                                                     | 246 | 81.30%                                                                                                                                           | 83.33%           | 82.52%          | 73.98%            | 76.83%            | 78.06%           | 83.33%            | 80.49%            | 82.93%           | 87.80% **        | 87.80% **        | 83.74% **       |  |

Fig. S6

**Independent Gene Classifiers using the Decision Tree Structure\***

\*Splitting criteria based on ROC sensitivity and specificity targets fixed for all gene classifiers

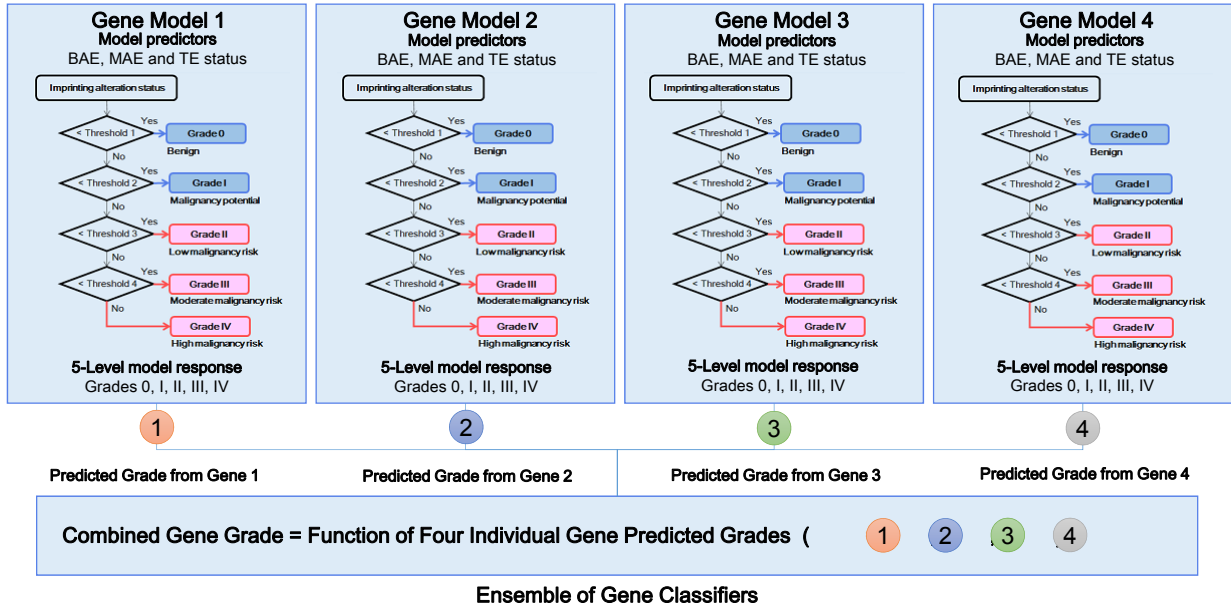

Fig. S7

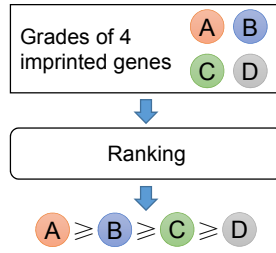

| Combined gene model     | Grades considered | Conditions | Combined gene grade |
|-------------------------|-------------------|------------|---------------------|
| Using the top 1 grade   | A                 | -          | A                   |
| Using the top 2 grades  | A B               | If A = B   | A                   |
|                         |                   | If A > B   | A - 1**             |
| Using the top 3 grades* | A B C             | If A = B   | A                   |
|                         |                   | If A > B   | A - 1**             |
| Using all 4 grades*     | A B C D           | If A = B   | A                   |
|                         |                   | If A > B   | A - 1**             |

A, B, C, D: Grades of each imprinted gene ranked from highest to lowest

\* Only Grades A and B obtained from the two genes with the highest alterations are considered for the combined gene grade.

\*\* When A > B, combined gene grade is equal to (A - 1) to maximize the predictive ability of the best gene, while minimally adjusting for potential variations in the predicted grades between the two best genes.

Fig. S8

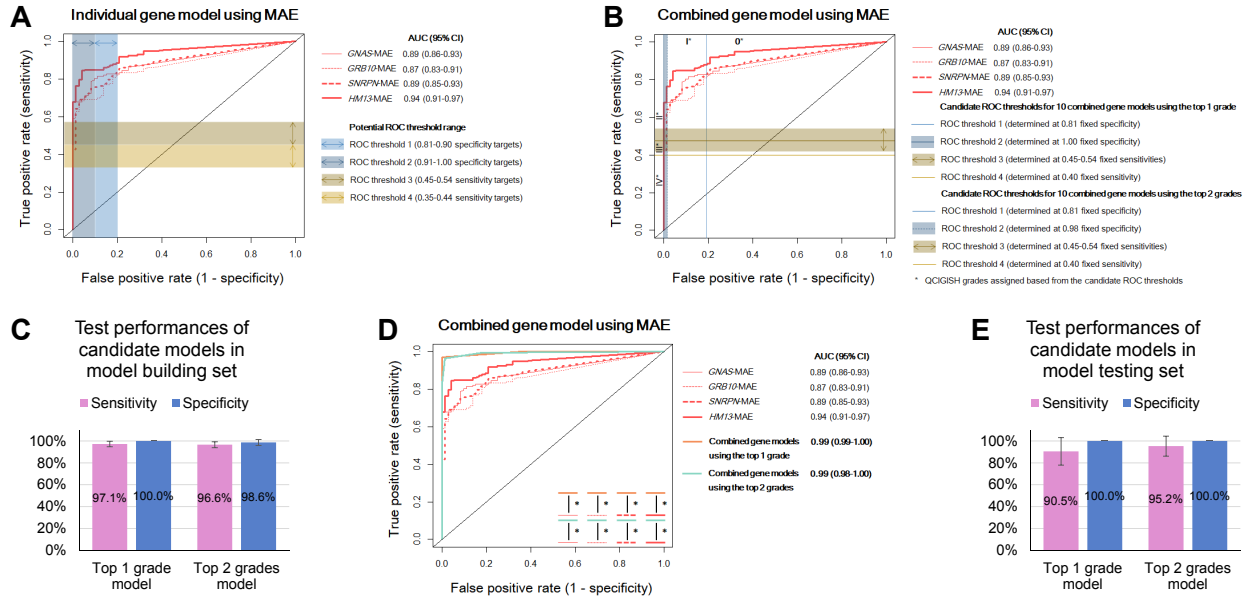



Fig. S9

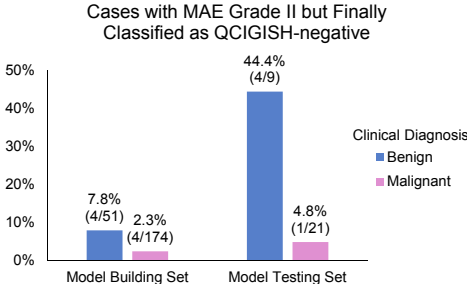

Fig. S10

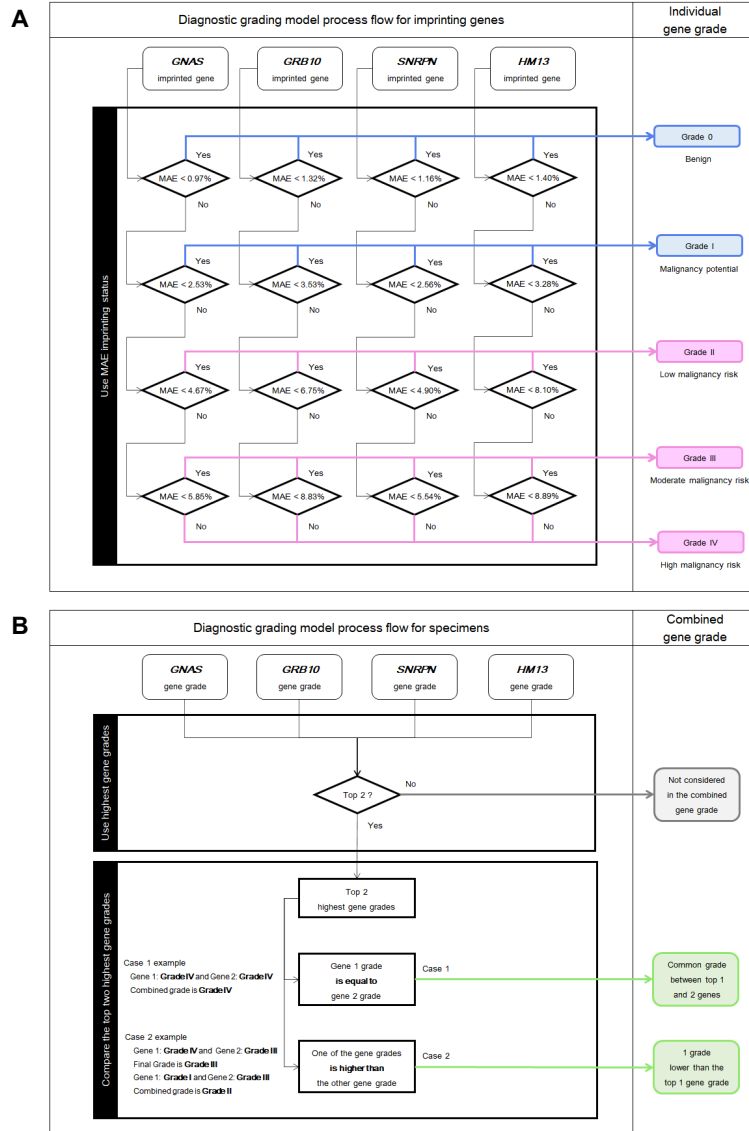

Fig. S11

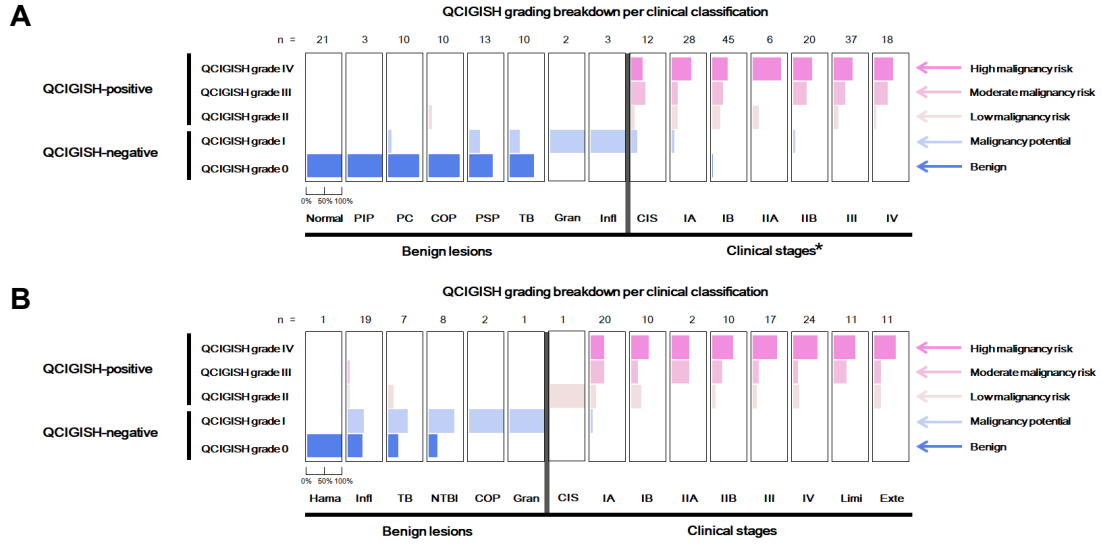

Fig. S12

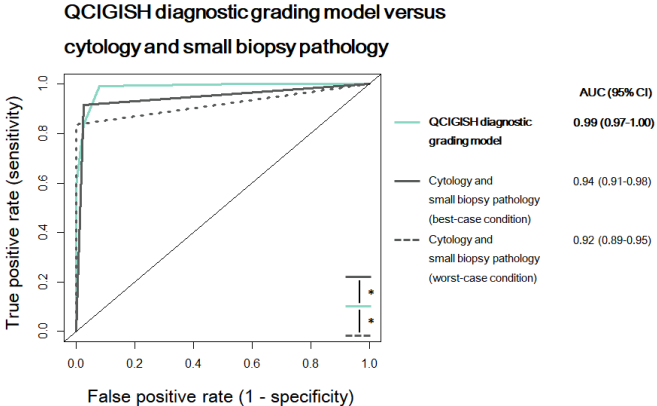

Fig. S13

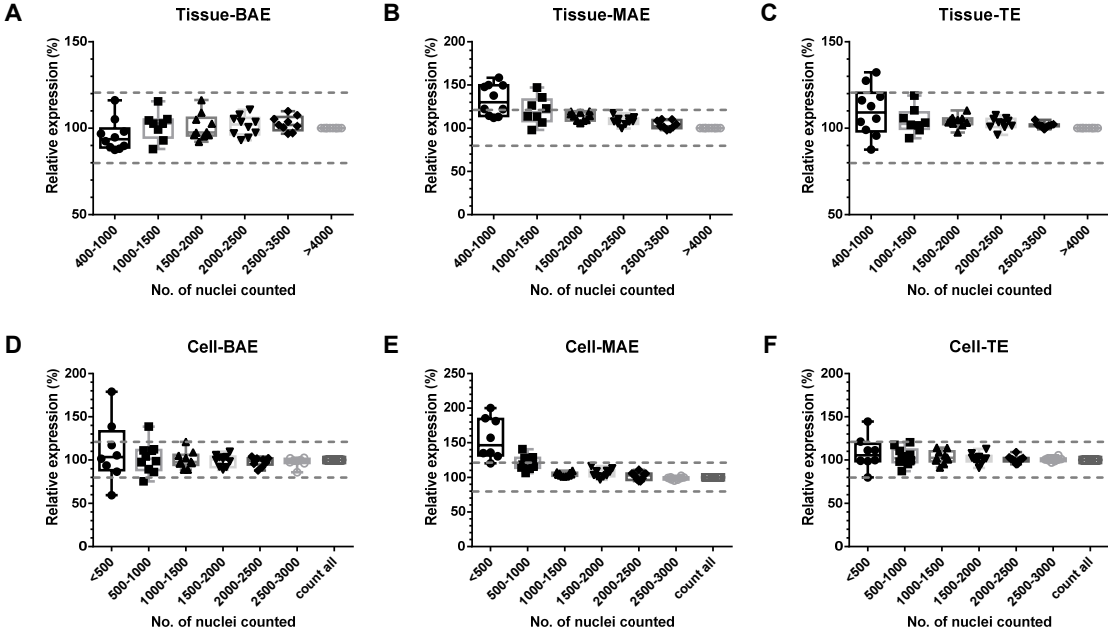

Fig. S14

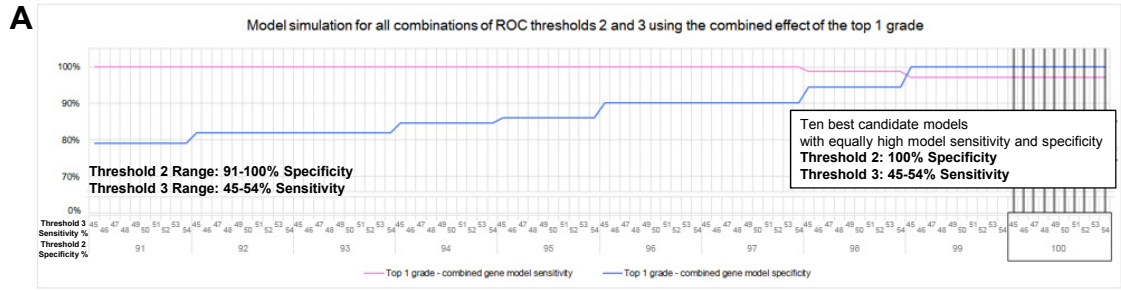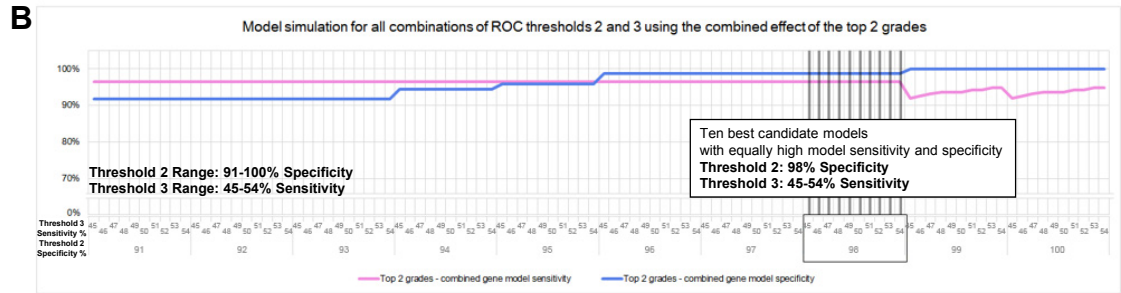

Supplement: 13148_2021_1203_MOESM1_ESM.pdf [file 13148_2021_1203_MOESM1_ESM.pdf]
